# Supplementary material for: A strategy for developing effective orally-delivered nanoparticles through modulation of the surface “hydrophilicity/hydrophobicity balance”
Source: Royal Society of Chemistry journal article supplement (doi:10.1039/c6tb02475k), 2017-01-01
Supplement: c6tb02475k1.pdf [file c6tb02475k1.pdf]

**Supporting Information for:**

**A strategy for developing effective orally-delivered nanoparticles through modulation of the surface “hydrophilicity/ hydrophobicity balance”**

Yi Cui <sup>1</sup>, Wei Shan <sup>1</sup>, Min Liu, Lei Wu, Yuan Huang \*

*Key Laboratory of Drug Targeting and Drug Delivery System (Ministry of Education), West China School of Pharmacy, Sichuan University, No. 17, Block 3, Southern Renmin Road, Chengdu 610041, China*

<sup>1</sup> Y.C. and W.S. contributed equally to this work.

\*E-mail: [huangyuan0@163.com](mailto:huangyuan0@163.com)

**Supporting Information Table S1:** Characteristics of synthesized HPMA-FAs copolymers.

| Copolymer | Mw(kDa) | PDI  | FAs (%) |
|-----------|---------|------|---------|
| HPMA-C8   | 65.9    | 1.26 | 10.5    |
| HPMA-C12  | 67.4    | 1.18 | 10.4    |
| HPMA-C14  | 62.7    | 1.23 | 10.6    |
| HPMA-C16  | 64.2    | 1.17 | 10.4    |

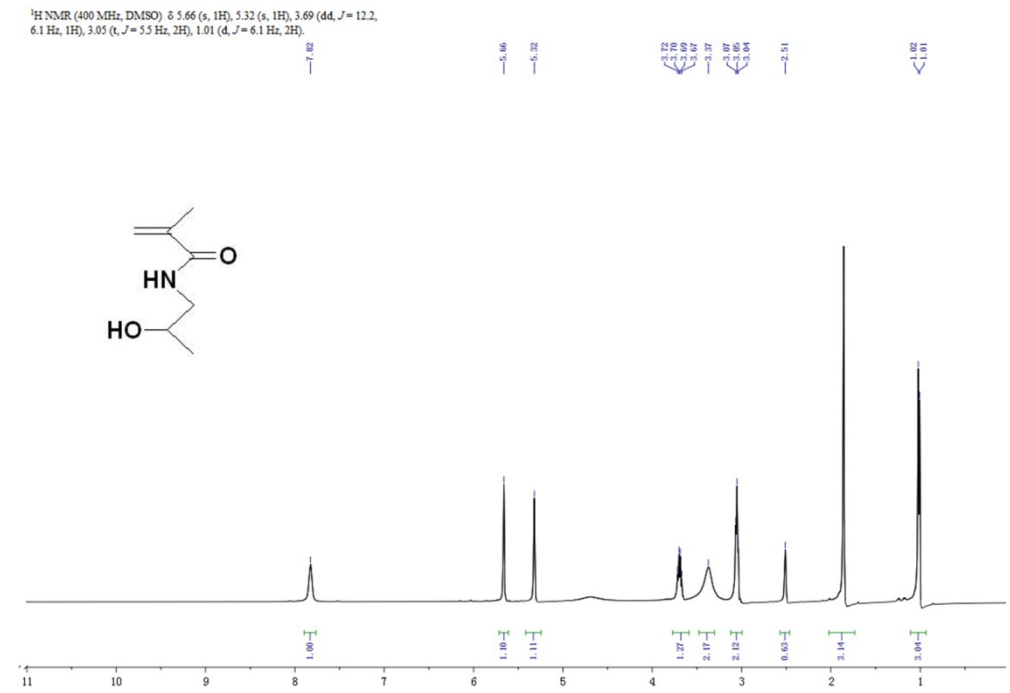

**Supporting Information Figure S1:** The <sup>1</sup>H-NMR (400 MHz, DMSO-d<sub>6</sub>) spectrum of HPMA monomer. δ(ppm) 5.66 (s, 1H), 5.32 (s, 1H), 3.69 (dd, J = 12.2, 6.1 Hz, 1H), 3.05 (t, J = 5.5 Hz, 2H), 1.01 (d, J = 6.1 Hz, 2H).

<sup>1</sup>H NMR (400 MHz, DMSO) δ 6.01 (s, 1H), 5.66 (s, 1H), 4.08 (t, *J* = 6.5 Hz, 2H), 2.50 (s, 2H), 1.87 (s, 2H), 1.59 (dd, *J* = 13.2, 6.5 Hz, 2H), 1.24 (s, 21H), 0.85 (t, *J* = 6.4 Hz, 3H).

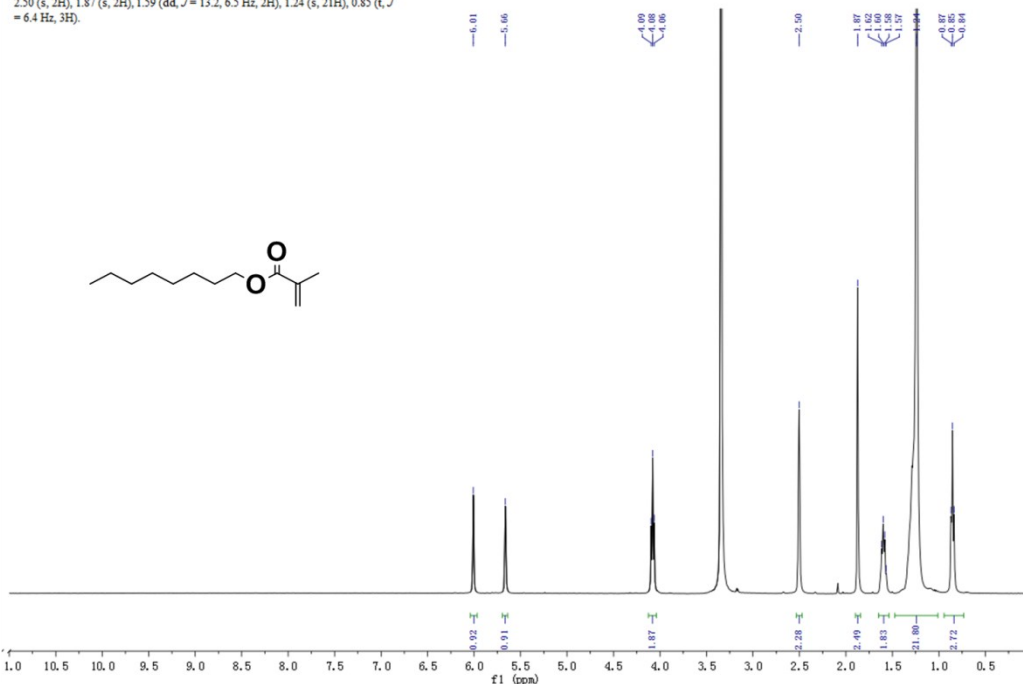

**Supporting Information Figure S2:** The <sup>1</sup>H-NMR (400 MHz, DMSO-d<sub>6</sub>) spectrum of *N*-octyl methacrylate. δ(ppm) 6.01 (s, 1H), 5.66 (s, 1H), 4.08 (t, *J* = 6.5 Hz, 2H), 2.50 (s, 2H), 1.87 (s, 2H), 1.59 (dd, *J* = 13.2, 6.5 Hz, 2H), 1.24 (s, 21H), 0.85 (t, *J* = 6.4 Hz, 3H).

<sup>1</sup>H NMR (400 MHz, DMSO) δ 7.18 (s, 1H), 6.00 (s, 1H), 5.65 (s, 1H), 4.70 (s, 1H), 3.66 (s, 1H), 2.89 (s, 2H), 2.49 (s, 2H), 1.86 (s, 1H), 1.55 (s, 1H), 1.23 (d, *J* = 3.4 Hz, 6H), 0.93 (d, *J* = 63.2 Hz, 10H), 0.85 (s, 4H).

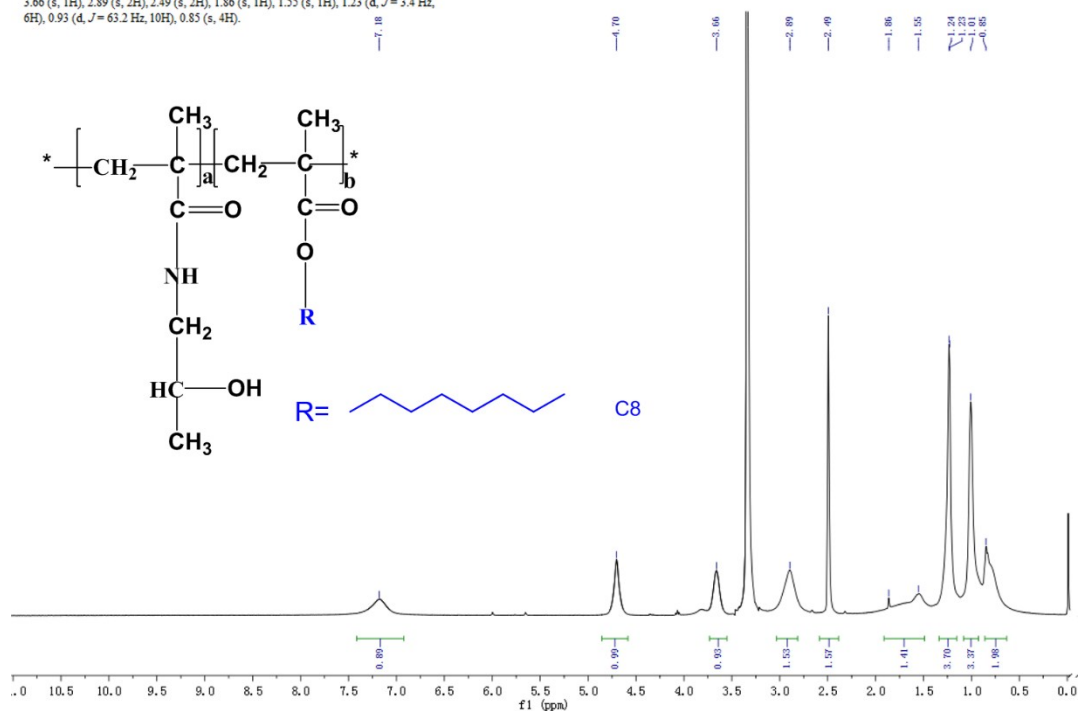

**Supporting Information Figure S3:** The <sup>1</sup>H-NMR (400 MHz, DMSO-d<sub>6</sub>) spectrum of HPMA-C8. δ(ppm) 7.18 (s, 1H), 6.00 (s, 1H), 5.65 (s, 1H), 4.70 (s, 1H), 3.66 (s, 1H), 2.89 (s, 2H), 2.49 (s, 2H), 1.86 (s, 1H), 1.55 (s, 1H), 1.23 (d, *J* = 3.4 Hz, 6H), 0.93 (d, *J* = 63.2 Hz, 10H), 0.85 (s, 4H).

$^1\text{H}$  NMR spectrum (400 MHz,  $\text{CDCl}_3$ ) of the copolymer. The chemical structure of the copolymer is shown, consisting of two repeating units: a poly(methyl methacrylate) unit (a) and a poly(2-methyl-2-((2-hydroxy-2-methylpropyl)oxy)ethyl methacrylate) unit (b). The R group is defined as a dodecyl chain (C12). The spectrum displays peaks corresponding to the protons in the copolymer, with integration values provided for several regions: 0.95, 1.06, 0.99, 1.79, 0.97, 0.93, 3.78, 3.44, and 2.06.

<sup>1</sup>H NMR (400 MHz, DMSO) δ 7.19 (s, 1H), 5.77–5.59 (m, 1H), 5.43–5.24 (m, 1H), 4.71 (s, 1H), 3.67 (s, 1H), 2.91 (s, 3H), 2.50 (s, 2H), 1.56 (s, 1H), 1.25 (s, 5H), 1.02 (s, 5H), 0.84 (d, *J* = 21.0 Hz, 3H).

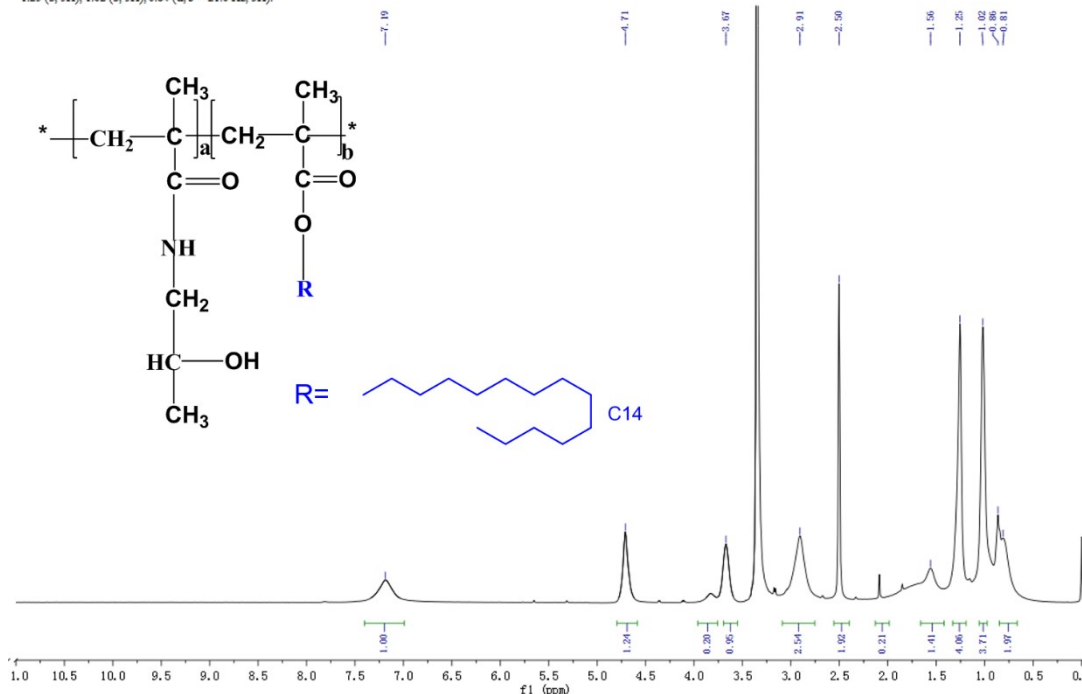

**Supporting Information Figure S5:** The  $^1\text{H}$ -NMR (400 MHz, DMSO- $d_6$ ) spectrum of HPMA-C14.  $\delta$ (ppm) 7.19 (s, 1H), 5.77–5.59 (m, 1H), 5.43–5.24 (m, 1H), 4.71 (s, 1H), 3.67 (s, 1H), 2.91 (s, 3H), 2.50 (s, 2H), 1.56 (s, 1H), 1.25 (s, 5H), 1.02 (s, 5H), 0.84 (d,  $J = 21.0$  Hz, 3H).

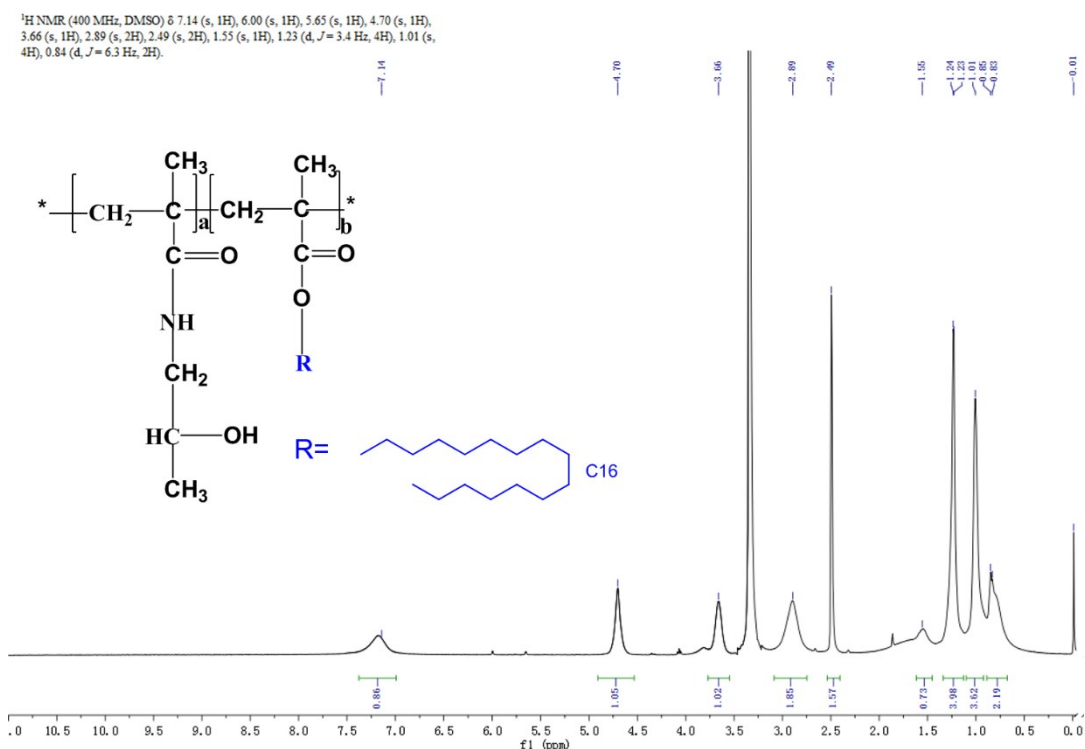

**Supporting Information Table S2:** The Zeta potential of NPs-PLGA coated with HPMA-C8 when dispersed medium was phosphate buffer saline ( PBS, 0.01 M, pH 7.3, 25 °C, I=0.041) or deionized water (pH 6.85, 25 °C)

| Samples      | Zeta potential (mV)<br>(In PBS buffer) | Zeta potential (mV)<br>(In deionized water) |
|--------------|----------------------------------------|---------------------------------------------|
| NPs-PLGA     | -11.2 ± 0.36                           | -20.6 ± 1.27                                |
| NPs-C8 (10%) | -6.0 ± 0.20                            | -16.9 ± 0.72                                |
| NPs-C8 (20%) | -3.7 ± 0.31                            | -11.6 ± 0.46                                |
| NPs-C8 (30%) | -3.1 ± 0.10                            | -9.68 ± 0.57                                |
| NPs-C8 (40%) | -2.9 ± 0.17                            | -7.02 ± 0.52                                |

**Supporting Information Table S3:** The area under of binding energies and the nitrogen atom composition percentage for PLGA NPs coated with HPMA-C8

| Samples     | Area under binding energy | Nitrogen atom content (%) |
|-------------|---------------------------|---------------------------|
| NPs-C8(10%) | 3595.2                    | 1.12                      |
| NPs-C8(20%) | 4844.5                    | 1.81                      |
| NPs-C8(30%) | 5355.2                    | 2.34                      |
| NPs-C8(40%) | 6980.2                    | 3.09                      |

**Supporting Information Figure S6:** The <sup>1</sup>H-NMR (400 MHz, DMSO-d<sub>6</sub>) spectrum of

HPMA-C16.  $\delta$ (ppm) 7.14 (s, 1H), 6.00 (s, 1H), 5.65 (s, 1H), 4.70 (s, 1H), 3.66 (s, 1H), 2.89 (s, 2H), 2.49 (s, 2H), 1.55 (s, 1H), 1.23 (d, J = 3.4 Hz, 4H), 1.01 (s, 4H), 0.84 (d, J = 6.3 Hz, 2H).

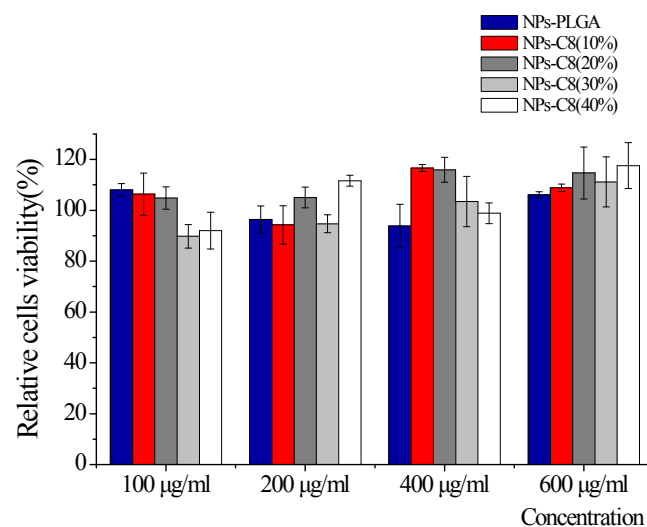

**Supporting Information Figure S7:** Cell viability after incubation of NPs samples. Data are means  $\pm$  SD (n=3).

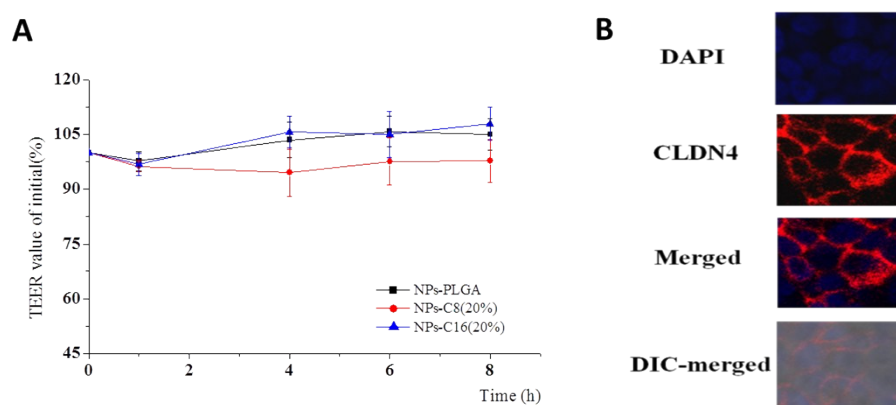

**Supporting Information Figure S8:** (A) The effect of NPs-PLGA, NPs-C8(20%), NPs-C16(20%) on TEER values of E12 cell monolayers. The TEER value was presented as the percentage of the value before three experiments. Data are means  $\pm$  SD (n= 3). (B) Immunofluorescence staining of the influence of tight junction by NPs. Cell monolayer was fixed and stained for Claudin-4 (Red). Blue represents the fluorescence of DAPI.
